# Supplementary material for: Personalized federated learning for predicting disability progression in multiple sclerosis using real-world routine clinical data
Source: Springer Nature journal article supplement (doi:10.1038/s41746-025-01788-8), 2025-07-24
Supplement: MOESM1 [file 41746_2025_1788_MOESM1_ESM.pdf]

# Personalized Federated Learning for Predicting Disability Progression in Multiple Sclerosis Using Real-World Routine Clinical Data

## 1 Supplementary Note

### 1.1 Recommendation Model in Detail

In this section, we presented the detailed results of the different paradigms, including the federated strategies for the federated approaches, across countries for both ROC–AUC and AUC–PR metrics. Supplementary Table 1 and 2 highlight the averages from 10 runs, while Supplementary Table 3 and 4 represent the standard deviations of these runs.

On top of the weighted average within Supplementary Table 1 and 2, we also report the macro average, where each client contributes equally, regardless of its dataset size. This complementary metric provides additional insight into model performance across the full client population. While the weighted average accounts for differences in client dataset sizes, it can be disproportionately influenced by clients with larger datasets and stronger performance. Moreover, it is important to recognize that federated optimization itself employs weighted aggregation during training, where client updates are combined in proportion to their local dataset sizes. As a result, larger clients have a stronger influence not only on evaluation but also on the global model during training. The smaller discrepancy between weighted and macro averages observed in personalized models suggests that personalization helps reduce this bias and enables better adaptation to clients with fewer samples. These findings highlight the need for caution when interpreting any single evaluation metric, as relying solely on weighted averages may overlook model behavior on underrepresented clients. Reporting both weighted and macro averages provides a more comprehensive understanding of model generalization under heterogeneous federated conditions.

**Supplementary Table 1.** Mean ROC–AUC scores, averaged over 10 runs, are presented for each learning paradigm: Centralized, Local, Federated, and Personalized Federated strategies (FedAVG, FedProx, FedAdam, FedYogi, FedAdagrad). The weighted average and macro average across all countries is also reported.

| Country          | Dataset Size | Centralized   | Local         | Federated |         |         |         |            | Fine-tuned    |               |         |               |            | Adaptive      |               |               |         |               |
|------------------|--------------|---------------|---------------|-----------|---------|---------|---------|------------|---------------|---------------|---------|---------------|------------|---------------|---------------|---------------|---------|---------------|
|                  |              |               |               | FedAVG    | FedProx | FedAdam | FedYogi | FedAdagrad | FedAVG        | FedProx       | FedAdam | FedYogi       | FedAdagrad | FedAVG        | FedProx       | FedAdam       | FedYogi | FedAdagrad    |
| CZ               | 55435        | 0.8781        | 0.8669        | 0.8918    | 0.8909  | 0.8948  | 0.9010  | 0.8883     | 0.9194        | 0.9193        | 0.9158  | <b>0.9222</b> | 0.9173     | 0.9199        | 0.9211        | 0.9198        | 0.9143  | 0.9184        |
| IT               | 54354        | 0.7769        | 0.7603        | 0.796     | 0.7946  | 0.7949  | 0.7951  | 0.7890     | 0.8099        | 0.8108        | 0.8108  | 0.8151        | 0.8045     | 0.8140        | <b>0.8168</b> | 0.8121        | 0.7966  | 0.8118        |
| TR               | 37853        | 0.8467        | 0.8498        | 0.8355    | 0.8365  | 0.8478  | 0.8482  | 0.8339     | 0.8810        | 0.8854        | 0.886   | 0.8881        | 0.8809     | <b>0.8891</b> | 0.8887        | 0.8872        | 0.8696  | 0.8843        |
| ES               | 33396        | 0.7713        | 0.7609        | 0.7691    | 0.7680  | 0.7784  | 0.7793  | 0.7642     | 0.7972        | 0.7969        | 0.8013  | 0.802         | 0.7938     | <b>0.8028</b> | 0.8027        | 0.8006        | 0.7789  | 0.7990        |
| CA               | 27131        | 0.7488        | 0.7332        | 0.7366    | 0.7370  | 0.7440  | 0.741   | 0.7327     | 0.7592        | 0.7615        | 0.7570  | 0.7573        | 0.7617     | 0.7597        | <b>0.7619</b> | 0.7543        | 0.7435  | 0.758         |
| AU               | 23906        | 0.7490        | 0.7287        | 0.7315    | 0.7300  | 0.7402  | 0.7419  | 0.7187     | 0.7678        | 0.7657        | 0.7623  | 0.767         | 0.7582     | <b>0.7692</b> | 0.7679        | 0.7594        | 0.7497  | 0.7681        |
| PT               | 6884         | 0.8252        | 0.7972        | 0.7389    | 0.7449  | 0.7557  | 0.7514  | 0.7377     | 0.8539        | 0.8525        | 0.8285  | 0.8266        | 0.8517     | 0.8496        | 0.8475        | 0.8212        | 0.8214  | <b>0.8542</b> |
| BE               | 6534         | 0.7963        | 0.7987        | 0.6560    | 0.6495  | 0.695   | 0.6678  | 0.6216     | 0.8183        | 0.8156        | 0.8134  | 0.8026        | 0.8186     | <b>0.8225</b> | 0.8115        | 0.8035        | 0.8084  | 0.8185        |
| KW               | 5725         | 0.8761        | 0.9164        | 0.7533    | 0.7445  | 0.7149  | 0.7178  | 0.7071     | <b>0.9200</b> | 0.9128        | 0.897   | 0.9002        | 0.9113     | 0.9038        | 0.9137        | 0.9000        | 0.8915  | 0.9044        |
| HU               | 4892         | 0.9495        | 0.9549        | 0.7065    | 0.7128  | 0.7883  | 0.7393  | 0.6892     | 0.9625        | <b>0.9632</b> | 0.9531  | 0.9507        | 0.9597     | 0.9559        | 0.9608        | 0.9391        | 0.8947  | 0.9557        |
| NL               | 4869         | 0.6873        | <b>0.7107</b> | 0.5592    | 0.5614  | 0.5796  | 0.5743  | 0.5515     | 0.6761        | 0.6782        | 0.6531  | 0.6628        | 0.6747     | 0.6642        | 0.6595        | 0.6537        | 0.6259  | 0.6567        |
| TN               | 4780         | 0.9319        | 0.9312        | 0.7816    | 0.7857  | 0.8194  | 0.7974  | 0.7577     | <b>0.9538</b> | 0.9535        | 0.946   | 0.9471        | 0.9492     | 0.9502        | 0.9535        | 0.946         | 0.9136  | 0.9451        |
| CH               | 3836         | <b>0.7925</b> | 0.7274        | 0.6197    | 0.6212  | 0.608   | 0.6145  | 0.5837     | 0.7748        | 0.7700        | 0.7368  | 0.7428        | 0.7690     | 0.7768        | 0.7650        | 0.7498        | 0.7480  | 0.7571        |
| IR               | 2980         | 0.8158        | 0.7471        | 0.6138    | 0.6396  | 0.6305  | 0.6205  | 0.6168     | 0.8190        | <b>0.8330</b> | 0.7838  | 0.7864        | 0.8148     | 0.8079        | 0.8269        | 0.7231        | 0.7032  | 0.8127        |
| AR               | 2440         | 0.8274        | 0.8784        | 0.6705    | 0.6714  | 0.7058  | 0.6842  | 0.6452     | 0.8690        | 0.8719        | 0.8711  | 0.8716        | 0.8682     | 0.8508        | <b>0.8856</b> | 0.7469        | 0.7105  | 0.8419        |
| LB               | 1937         | 0.7314        | 0.6553        | 0.6062    | 0.5955  | 0.6023  | 0.6149  | 0.6164     | 0.7462        | 0.7398        | 0.7544  | 0.7417        | 0.7619     | 0.7336        | 0.7589        | <b>0.7741</b> | 0.7534  | 0.7574        |
| US               | 1344         | 0.7437        | 0.7044        | 0.5713    | 0.5627  | 0.5637  | 0.5888  | 0.5674     | 0.7418        | 0.7368        | 0.7160  | <b>0.7439</b> | 0.7308     | 0.7053        | 0.7303        | 0.6902        | 0.6014  | 0.7135        |
| IL               | 1140         | 0.8537        | 0.8503        | 0.6918    | 0.6937  | 0.7225  | 0.6835  | 0.6942     | <b>0.8795</b> | 0.8782        | 0.8693  | 0.8745        | 0.8773     | 0.8698        | 0.875         | 0.8693        | 0.8075  | 0.8762        |
| OM               | 969          | 0.8093        | 0.7981        | 0.5276    | 0.5339  | 0.5086  | 0.533   | 0.4890     | 0.8618        | <b>0.8731</b> | 0.8349  | 0.8361        | 0.8277     | 0.8650        | 0.8472        | 0.8531        | 0.7483  | 0.8590        |
| CU               | 782          | 0.8062        | <b>0.8266</b> | 0.5768    | 0.5625  | 0.6726  | 0.6565  | 0.5890     | 0.8043        | 0.8050        | 0.8093  | 0.8112        | 0.8076     | 0.7924        | 0.7971        | 0.7775        | 0.7509  | 0.7848        |
| BR               | 578          | 0.7307        | 0.7070        | 0.6355    | 0.5768  | 0.5129  | 0.5281  | 0.5540     | 0.7736        | 0.7680        | 0.7877  | <b>0.8303</b> | 0.7825     | 0.7960        | 0.8063        | 0.8000        | 0.7394  | 0.7733        |
| SA               | 256          | <b>0.9374</b> | 0.8827        | 0.6170    | 0.6749  | 0.7494  | 0.6704  | 0.6915     | 0.8953        | 0.8677        | 0.8643  | 0.8629        | 0.8877     | 0.8974        | 0.8915        | 0.8740        | 0.8740  | 0.9166        |
| GB               | 221          | <b>0.8510</b> | 0.5333        | 0.7580    | 0.6520  | 0.7210  | 0.6778  | 0.7160     | 0.7625        | 0.6880        | 0.7100  | 0.6261        | 0.7675     | 0.6410        | 0.6060        | 0.6475        | 0.7850  | 0.7055        |
| NZ               | 110          | 0.419         | 0.5873        | 0.4667    | 0.3286  | 0.5524  | 0.4497  | 0.3571     | 0.6238        | 0.4857        | 0.6238  | 0.6243        | 0.6571     | 0.6286        | 0.6095        | 0.581         | 0.2714  | <b>0.6905</b> |
| GR               | 99           | <b>0.9292</b> | 0.7998        | 0.7146    | 0.724   | 0.6932  | 0.7141  | 0.7167     | 0.8958        | 0.8703        | 0.8495  | 0.8976        | 0.8604     | 0.8609        | 0.8714        | 0.9062        | 0.8828  | 0.837         |
| Weighted Average |              | 0.8092        | 0.7983        | 0.784     | 0.7835  | 0.7919  | 0.7910  | 0.7762     | 0.837         | 0.8375        | 0.8339  | 0.8369        | 0.8340     | 0.8384        | <b>0.8398</b> | 0.8324        | 0.8178  | 0.8361        |
| Macro Average    |              | 0.8034        | 0.7803        | 0.6809    | 0.6717  | 0.6958  | 0.6836  | 0.6651     | <b>0.8226</b> | 0.8121        | 0.8094  | 0.8116        | 0.8197     | 0.8130        | 0.8150        | 0.7996        | 0.7673  | 0.8159        |

### 1.2 The Best Analysis Paradigms for each Country

This section provides an overview to identify the best-performing paradigm for each country by comparing the results. It highlights the top-performing model for each country, along with its respective score, offering a clear overview of which paradigm performs best in each case.

### 1.3 Benchmarking Personalized Federated Models

This section provides implementation details for the benchmark PFL algorithms, Ditto<sup>1</sup> and FedPer<sup>2</sup>, which are used for comparison against our proposed AdaptiveDualBranchNet. To ensure experimental consistency, both methods were implemented using

**Supplementary Table 2.** Average AUC–PR Performance Across Paradigms and Countries. Mean AUC–PR scores, averaged over 10 runs, are reported for each learning paradigm: Centralized, Local, Federated, and Personalized Federated strategies (FedAVG, FedProx, FedAdam, FedYogi, FedAdagrad). The weighted average and macro average across all countries is also provided.

| Country          | Dataset Size | Centralized   | Local         | Federated |         |         |         |            | Fine-tuned    |               |               |               |               | Adaptive |               |               |         |            |
|------------------|--------------|---------------|---------------|-----------|---------|---------|---------|------------|---------------|---------------|---------------|---------------|---------------|----------|---------------|---------------|---------|------------|
|                  |              |               |               | FedAVG    | FedProx | FedAdam | FedYogi | FedAdagrad | FedAVG        | FedProx       | FedAdam       | FedYogi       | FedAdagrad    | FedAVG   | FedProx       | FedAdam       | FedYogi | FedAdagrad |
| CZ               | 55435        | 0.5568        | 0.4600        | 0.5803    | 0.5875  | 0.6536  | 0.6482  | 0.5667     | 0.6885        | 0.6990        | 0.7197        | <b>0.7266</b> | 0.6719        | 0.7192   | 0.7214        | 0.7128        | 0.6633  | 0.6985     |
| IT               | 54354        | 0.4312        | 0.3491        | 0.4509    | 0.459   | 0.4798  | 0.4841  | 0.4377     | 0.4831        | 0.4924        | 0.5175        | <b>0.5247</b> | 0.4687        | 0.5034   | 0.5099        | 0.5116        | 0.4710  | 0.4909     |
| TR               | 37853        | 0.483         | 0.4161        | 0.4402    | 0.4427  | 0.5248  | 0.5146  | 0.4305     | 0.5583        | 0.5716        | <b>0.6139</b> | 0.6041        | 0.5509        | 0.5852   | 0.5953        | 0.5936        | 0.5278  | 0.5631     |
| ES               | 33396        | 0.4055        | 0.3381        | 0.3762    | 0.3819  | 0.4085  | 0.4055  | 0.373      | 0.4302        | 0.4393        | <b>0.4644</b> | 0.4582        | 0.4313        | 0.4503   | 0.4564        | 0.4504        | 0.4018  | 0.4294     |
| CA               | 27131        | 0.3893        | 0.3407        | 0.3408    | 0.3383  | 0.3606  | 0.3465  | 0.3369     | 0.3958        | 0.3949        | <b>0.4108</b> | 0.4044        | 0.3957        | 0.4032   | 0.3965        | 0.3982        | 0.3764  | 0.391      |
| AU               | 23906        | 0.3882        | 0.3129        | 0.3037    | 0.3098  | 0.3372  | 0.3372  | 0.2884     | 0.3782        | 0.3805        | 0.3955        | 0.3925        | 0.3558        | 0.3920   | <b>0.3962</b> | 0.3769        | 0.3456  | 0.3769     |
| PT               | 6884         | 0.449         | 0.3562        | 0.2445    | 0.2627  | 0.2744  | 0.2599  | 0.2440     | 0.4485        | <b>0.4774</b> | 0.4464        | 0.4434        | 0.4610        | 0.4545   | 0.4524        | 0.4208        | 0.4040  | 0.4658     |
| BE               | 6534         | 0.3553        | 0.2987        | 0.153     | 0.1559  | 0.2077  | 0.1876  | 0.1356     | 0.4072        | 0.405         | <b>0.4130</b> | 0.3978        | 0.3868        | 0.4022   | 0.398         | 0.3737        | 0.3586  | 0.3797     |
| KW               | 5725         | 0.4558        | 0.4850        | 0.1719    | 0.1661  | 0.1526  | 0.1518  | 0.1408     | <b>0.5404</b> | 0.5111        | 0.4789        | 0.4919        | 0.5143        | 0.5004   | 0.5104        | 0.4729        | 0.4280  | 0.4659     |
| HU               | 4892         | 0.7311        | 0.5924        | 0.2944    | 0.3099  | 0.4085  | 0.3254  | 0.2388     | <b>0.7887</b> | 0.779         | 0.7667        | 0.7221        | 0.7623        | 0.7501   | 0.781         | 0.6076        | 0.3464  | 0.7533     |
| NL               | 4869         | <b>0.2826</b> | 0.2650        | 0.1750    | 0.1797  | 0.1872  | 0.1876  | 0.176      | 0.2733        | 0.2756        | 0.2529        | 0.2619        | 0.2734        | 0.2611   | 0.2539        | 0.2519        | 0.2114  | 0.2556     |
| TN               | 4780         | 0.8178        | 0.804         | 0.4926    | 0.503   | 0.5926  | 0.5535  | 0.4682     | 0.8627        | <b>0.8664</b> | 0.8432        | 0.8369        | 0.8452        | 0.8441   | 0.8639        | 0.8416        | 0.7411  | 0.8313     |
| CH               | 3836         | 0.3084        | 0.1952        | 0.1187    | 0.1232  | 0.1183  | 0.1204  | 0.1121     | <b>0.3400</b> | 0.3196        | 0.2887        | 0.3005        | 0.3121        | 0.3336   | 0.3042        | 0.2877        | 0.2548  | 0.2983     |
| IR               | 2980         | 0.5345        | 0.3682        | 0.2382    | 0.2514  | 0.2628  | 0.2277  | 0.2276     | 0.5369        | <b>0.5702</b> | 0.5119        | 0.5294        | 0.5261        | 0.5265   | 0.5570        | 0.3684        | 0.3216  | 0.5212     |
| AR               | 2440         | 0.5801        | 0.5946        | 0.2617    | 0.2625  | 0.3011  | 0.2578  | 0.2211     | <b>0.6332</b> | 0.6331        | 0.6255        | 0.5897        | 0.6111        | 0.5212   | 0.6287        | 0.2828        | 0.2372  | 0.5229     |
| LB               | 1937         | 0.2756        | 0.2255        | 0.1287    | 0.1171  | 0.1193  | 0.1259  | 0.1232     | 0.3334        | 0.3187        | 0.3139        | 0.3467        | <b>0.3219</b> | 0.2788   | 0.3343        | <b>0.3853</b> | 0.3245  | 0.3376     |
| US               | 1344         | 0.3128        | 0.2433        | 0.1441    | 0.1383  | 0.1266  | 0.1382  | 0.1493     | 0.3142        | 0.2797        | 0.2337        | 0.2860        | <b>0.3219</b> | 0.2552   | 0.2493        | 0.1899        | 0.1313  | 0.239      |
| IL               | 1140         | 0.5198        | 0.5181        | 0.2702    | 0.2604  | 0.2581  | 0.2743  | 0.2397     | 0.6307        | <b>0.6310</b> | 0.5660        | 0.6065        | 0.5879        | 0.5899   | 0.5986        | 0.5540        | 0.4258  | 0.5727     |
| OM               | 969          | 0.4763        | 0.2995        | 0.1024    | 0.0962  | 0.0858  | 0.093   | 0.0994     | 0.5753        | <b>0.5897</b> | 0.5157        | 0.5192        | 0.5477        | 0.5480   | 0.5421        | 0.5505        | 0.2538  | 0.5178     |
| CU               | 782          | 0.4775        | <b>0.5260</b> | 0.1882    | 0.1864  | 0.2688  | 0.2458  | 0.1967     | 0.458         | 0.4744        | 0.4554        | 0.4369        | 0.4491        | 0.432    | 0.419         | 0.3859        | 0.3309  | 0.4225     |
| BR               | 578          | 0.4677        | 0.4605        | 0.174     | 0.1434  | 0.1214  | 0.1118  | 0.1181     | <b>0.4911</b> | 0.4200        | 0.4832        | 0.4511        | 0.4209        | 0.3897   | 0.4308        | 0.3653        | 0.2558  | 0.3937     |
| SA               | 256          | 0.6851        | <b>0.7674</b> | 0.1858    | 0.2466  | 0.2986  | 0.2577  | 0.2888     | 0.6288        | 0.5619        | 0.4946        | 0.4998        | 0.6547        | 0.5997   | 0.659         | 0.529         | 0.4330  | 0.6318     |
| GB               | 221          | <b>0.4774</b> | 0.2529        | 0.3233    | 0.2576  | 0.2889  | 0.3177  | 0.287      | 0.3653        | 0.3007        | 0.3117        | 0.3141        | 0.3541        | 0.3371   | 0.3250        | 0.3100        | 0.3643  | 0.3142     |
| NZ               | 110          | 0.0810        | 0.1057        | 0.0866    | 0.0738  | 0.1533  | 0.1247  | 0.0717     | 0.1377        | 0.1094        | <b>0.2039</b> | 0.1890        | 0.1857        | 0.1332   | 0.1247        | 0.1185        | 0.0722  | 0.1577     |
| GR               | 99           | <b>0.9082</b> | 0.8048        | 0.6472    | 0.6495  | 0.5825  | 0.6245  | 0.6739     | 0.8955        | 0.8777        | 0.8127        | 0.8837        | 0.8692        | 0.8577   | 0.8794        | 0.8982        | 0.8531  | 0.8428     |
| Weighted Average |              | 0.4605        | 0.3874        | 0.4030    | 0.4081  | 0.4488  | 0.442   | 0.3913     | 0.5156        | 0.5221        | <b>0.5383</b> | 0.5379        | 0.5043        | 0.5291   | 0.5346        | 0.5197        | 0.4703  | 0.5131     |
| Macro Average    |              | 0.4740        | 0.4152        | 0.2757    | 0.2761  | 0.3029  | 0.2928  | 0.2658     | <b>0.5038</b> | 0.4951        | 0.4855        | 0.4886        | 0.4911        | 0.4827   | 0.4955        | 0.4495        | 0.3813  | 0.4749     |

**Supplementary Table 3.** Standard Deviation of the ROC–AUC Scores for Each Paradigm Across Countries

| Country | Dataset Size | Centralized | Local  | Federated |         |         |         |            | fine-tuned |         |         |         |            | Adaptive |         |         |         |            |
|---------|--------------|-------------|--------|-----------|---------|---------|---------|------------|------------|---------|---------|---------|------------|----------|---------|---------|---------|------------|
|         |              |             |        | FedAVG    | FedProx | FedAdam | FedYogi | FedAdagrad | FedAVG     | FedProx | FedAdam | FedYogi | FedAdagrad | FedAVG   | FedProx | FedAdam | FedYogi | FedAdagrad |
| CZ      | 55435        | 0.0017      | 0.0133 | 0.0055    | 0.0026  | 0.0063  | 0.0063  | 0.0045     | 0.0023     | 0.0030  | 0.0034  | 0.0021  | 0.0028     | 0.0019   | 0.0021  | 0.0027  | 0.0029  | 0.0021     |
| IT      | 54354        | 0.0029      | 0.0068 | 0.0034    | 0.0044  | 0.0060  | 0.0054  | 0.0013     | 0.0046     | 0.0034  | 0.0051  | 0.0036  | 0.0033     | 0.0042   | 0.0032  | 0.0064  | 0.0036  | 0.0038     |
| TR      | 37853        | 0.0045      | 0.0078 | 0.0048    | 0.0059  | 0.0065  | 0.0045  | 0.0046     | 0.0034     | 0.0043  | 0.0043  | 0.0029  | 0.0041     | 0.0031   | 0.0038  | 0.0046  | 0.0042  | 0.0040     |
| ES      | 33396        | 0.0051      | 0.0115 | 0.0049    | 0.0038  | 0.0091  | 0.0070  | 0.0051     | 0.0046     | 0.0031  | 0.0068  | 0.0050  | 0.0055     | 0.0049   | 0.0046  | 0.0073  | 0.0051  | 0.0059     |
| CA      | 27131        | 0.0058      | 0.0068 | 0.0055    | 0.0053  | 0.0058  | 0.0060  | 0.0080     | 0.0043     | 0.0040  | 0.0063  | 0.0068  | 0.0053     | 0.0041   | 0.0056  | 0.0040  | 0.0061  | 0.0069     |
| AU      | 23906        | 0.0057      | 0.0041 | 0.0086    | 0.0090  | 0.0076  | 0.0088  | 0.0049     | 0.0044     | 0.0096  | 0.0058  | 0.0067  | 0.0049     | 0.0062   | 0.0100  | 0.0072  | 0.0061  | 0.0104     |
| PT      | 6884         | 0.0119      | 0.0040 | 0.0145    | 0.0129  | 0.0151  | 0.0109  | 0.0151     | 0.0123     | 0.0058  | 0.0128  | 0.0170  | 0.0121     | 0.0123   | 0.0087  | 0.0181  | 0.0146  | 0.0085     |
| BE      | 6534         | 0.0109      | 0.0088 | 0.0094    | 0.0104  | 0.0183  | 0.0234  | 0.0104     | 0.0091     | 0.0082  | 0.0114  | 0.0110  | 0.0093     | 0.0125   | 0.0117  | 0.0101  | 0.0118  | 0.0117     |
| KW      | 5725         | 0.0114      | 0.0027 | 0.0180    | 0.0216  | 0.0234  | 0.0253  | 0.0285     | 0.0134     | 0.0118  | 0.0080  | 0.0095  | 0.0121     | 0.0077   | 0.0065  | 0.0133  | 0.0128  | 0.0097     |
| HU      | 4892         | 0.0037      | 0.0033 | 0.0309    | 0.0464  | 0.0624  | 0.0525  | 0.0290     | 0.0070     | 0.0047  | 0.0085  | 0.0095  | 0.0044     | 0.0056   | 0.0077  | 0.0138  | 0.0197  | 0.0046     |
| NL      | 4869         | 0.0114      | 0.0077 | 0.0147    | 0.0203  | 0.0141  | 0.0136  | 0.0089     | 0.0245     | 0.0227  | 0.0148  | 0.0221  | 0.0143     | 0.0237   | 0.0210  | 0.0349  | 0.0100  | 0.0183     |
| TN      | 4780         | 0.0051      | 0.0081 | 0.0153    | 0.0087  | 0.0194  | 0.0140  | 0.0211     | 0.0038     | 0.0038  | 0.0076  | 0.0063  | 0.0044     | 0.0053   | 0.0045  | 0.0078  | 0.0058  | 0.0037     |
| CH      | 3836         | 0.0151      | 0.0061 | 0.0258    | 0.0331  | 0.0216  | 0.0331  | 0.0319     | 0.0277     | 0.0130  | 0.0117  | 0.0209  | 0.0249     | 0.0213   | 0.0271  | 0.0106  | 0.0225  | 0.0147     |
| IR      | 2980         | 0.0142      | 0.0067 | 0.0212    | 0.0256  | 0.0175  | 0.0368  | 0.0167     | 0.0211     | 0.0150  | 0.0183  | 0.0241  | 0.0195     | 0.0131   | 0.0162  | 0.0476  | 0.0202  | 0.0124     |
| AR      | 2440         | 0.0109      | 0.0042 | 0.0251    | 0.0221  | 0.0153  | 0.0344  | 0.0248     | 0.0116     | 0.0153  | 0.0172  | 0.0180  | 0.0167     | 0.0102   | 0.0138  | 0.0539  | 0.0331  | 0.0108     |
| LB      | 1937         | 0.0401      | 0.0161 | 0.0337    | 0.0297  | 0.0435  | 0.0396  | 0.0272     | 0.0230     | 0.0265  | 0.0280  | 0.0402  | 0.0175     | 0.0335   | 0.0353  | 0.0250  | 0.0305  | 0.0210     |
| US      | 1344         | 0.0303      | 0.0154 | 0.0415    | 0.0294  | 0.0410  | 0.0447  | 0.0330     | 0.0319     | 0.0247  | 0.0295  | 0.0460  | 0.0328     | 0.0312   | 0.0339  | 0.0381  | 0.0402  | 0.0352     |
| IL      | 1140         | 0.0116      | 0.0112 | 0.0369    | 0.0250  | 0.0249  | 0.0423  | 0.0264     | 0.0136     | 0.0197  | 0.0126  | 0.0225  | 0.0087     | 0.0163   | 0.0150  | 0.0152  | 0.0192  | 0.0129     |
| OM      | 969          | 0.0445      | 0.0135 | 0.0504    | 0.0429  | 0.0292  | 0.0835  | 0.0745     | 0.0248     | 0.0326  | 0.0266  | 0.0499  | 0.0454     | 0.0415   | 0.0350  | 0.0406  | 0.0345  | 0.0360     |
| CU      | 782          | 0.0188      | 0.0089 | 0.0248    | 0.0435  | 0.0491  | 0.0278  | 0.0341     | 0.0196     | 0.0151  | 0.0371  | 0.0214  | 0.0174     | 0.0229   | 0.0133  | 0.0331  | 0.0188  | 0.0227     |
| BR      | 578          | 0.0473      | 0.0298 | 0.0670    | 0.0587  | 0.0965  | 0.0476  | 0.0496     | 0.0670     | 0.0590  | 0.0730  | 0.0603  | 0.0522     | 0.0617   | 0.0696  | 0.0523  | 0.0693  | 0.0649     |
| SA      | 256          | 0.0362      | 0.0211 | 0.0581    | 0.0642  | 0.0685  | 0.0767  | 0.0807     | 0.0383     | 0.0562  | 0.0701  | 0.0846  | 0.0664     | 0.0685   | 0.0694  | 0.0681  | 0.0602  | 0.0225     |
| GB      | 221          | 0.0512      | 0.0400 | 0.0764    | 0.0563  | 0.1026  | 0.1047  | 0.0669     | 0.0754     | 0.0653  | 0.1139  | 0.0950  | 0.0709     | 0.0496   | 0.0524  | 0.0823  | 0.0706  | 0.0512     |
| NZ      | 110          | 0.1409      | 0.0673 | 0.1274    | 0.1800  | 0.2644  | 0.2511  | 0.1190     | 0.1600     | 0.2571  | 0.2772  | 0.3130  | 0.2201     | 0.1518   | 0.1605  | 0.1741  | 0.2054  | 0.1317     |
| GR      | 99           | 0.0212      | 0.0095 | 0.0412    | 0.0716  | 0.0748  | 0.0877  | 0.0803     | 0.0557     | 0.0354  | 0.0607  | 0.0418  | 0.0637     | 0.0528   | 0.0472  | 0.0586  | 0.0636  | 0.0467     |

**Supplementary Table 4.** Standard Deviation of the AUC–PR Scores for Each Paradigm Across Countries

| Country | Dataset Size | Centralized | Local  | Federated |         |         |         |            | fine-tuned |         |         |         |            | Adaptive |         |         |         |            |
|---------|--------------|-------------|--------|-----------|---------|---------|---------|------------|------------|---------|---------|---------|------------|----------|---------|---------|---------|------------|
|         |              |             |        | FedAVG    | FedProx | FedAdam | FedYogi | FedAdagrad | FedAVG     | FedProx | FedAdam | FedYogi | FedAdagrad | FedAVG   | FedProx | FedAdam | FedYogi | FedAdagrad |
| CZ      | 55435        | 0.0095      | 0.0463 | 0.0209    | 0.0155  | 0.0153  | 0.0131  | 0.0161     | 0.0128     | 0.0129  | 0.0080  | 0.0122  | 0.0141     | 0.0087   | 0.0059  | 0.0128  | 0.0146  | 0.0122     |
| IT      | 54354        | 0.0032      | 0.0129 | 0.0121    | 0.0086  | 0.0139  | 0.0110  | 0.0086     | 0.0096     | 0.0080  | 0.0090  | 0.0082  | 0.0078     | 0.0106   | 0.0043  | 0.0140  | 0.0062  | 0.0106     |
| TR      | 37853        | 0.0118      | 0.0210 | 0.0144    | 0.0121  | 0.0172  | 0.0163  | 0.0158     | 0.0134     | 0.0094  | 0.0102  | 0.0127  | 0.0143     | 0.0167   | 0.0090  | 0.0157  | 0.0241  | 0.0167     |
| ES      | 33396        | 0.0096      | 0.0166 | 0.0109    | 0.0106  | 0.0148  | 0.0143  | 0.0115     | 0.0095     | 0.0104  | 0.0154  | 0.0113  | 0.0133     | 0.0118   | 0.0076  | 0.0119  | 0.0095  | 0.0133     |
| CA      | 27131        | 0.0066      | 0.0148 | 0.0097    | 0.0110  | 0.0135  | 0.0072  | 0.0130     | 0.0124     | 0.0077  | 0.0111  | 0.0078  | 0.0098     | 0.0108   | 0.0087  | 0.0124  | 0.0109  | 0.0066     |
| AU      | 23906        | 0.0118      | 0.0068 | 0.0104    | 0.0125  | 0.0153  | 0.0198  | 0.0097     | 0.0130     | 0.0125  | 0.0086  | 0.0137  | 0.0082     | 0.0100   | 0.0168  | 0.0131  | 0.0076  | 0.0191     |
| PT      | 6884         | 0.0227      | 0.0078 | 0.0216    | 0.0211  | 0.0316  | 0.0155  | 0.0210     | 0.0264     | 0.0211  | 0.0271  | 0.0282  | 0.0287     | 0.0154   | 0.0257  | 0.0297  | 0.0205  | 0.0312     |
| BE      | 6534         | 0.0173      | 0.0136 | 0.0137    | 0.0087  | 0.0177  | 0.0243  | 0.0102     | 0.0120     | 0.0229  | 0.0254  | 0.0204  | 0.0156     | 0.0339   | 0.0195  | 0.0314  | 0.0218  | 0.0294     |
| KW      | 5725         | 0.0246      | 0.0294 | 0.0204    | 0.0208  | 0.0210  | 0.0240  | 0.0152     | 0.0593     | 0.0601  | 0.0366  | 0.0506  | 0.0350     | 0.0502   | 0.0441  | 0.0505  | 0.0576  | 0.0542     |
| HU      | 4892         | 0.0211      | 0.0358 | 0.0327    | 0.0432  | 0.0440  | 0.0364  | 0.0298     | 0.0281     | 0.0481  | 0.0310  | 0.0431  | 0.0294     | 0.0343   | 0.0336  | 0.1354  | 0.0904  | 0.0244     |
| NL      | 4869         | 0.0102      | 0.0137 | 0.0099    | 0.0096  | 0.0107  | 0.0119  | 0.0112     | 0.0290     | 0.0185  | 0.0147  | 0.0185  | 0.0128     | 0.0144   | 0.0162  | 0.0407  | 0.0087  | 0.0218     |
| TN      | 4780         | 0.0132      | 0.0271 | 0.0208    | 0.0204  | 0.0483  | 0.0377  | 0.0341     | 0.0114     | 0.0188  | 0.0243  | 0.0244  | 0.0160     | 0.0173   | 0.0138  | 0.0191  | 0.0280  | 0.0114     |
| CH      | 3836         | 0.0214      | 0.0096 | 0.0112    | 0.0146  | 0.0109  | 0.0201  | 0.0122     | 0.0375     | 0.0340  | 0.0468  | 0.0530  | 0.0414     | 0.0512   | 0.0485  | 0.0315  | 0.0360  | 0.0276     |
| IR      | 2980         | 0.0298      | 0.0117 | 0.0174    | 0.0251  | 0.0314  | 0.0337  | 0.0200     | 0.0223     | 0.0393  | 0.0380  | 0.0360  | 0.0291     | 0.0181   | 0.0186  | 0.0832  | 0.0541  | 0.0317     |
| AR      | 2440         | 0.0245      | 0.0155 | 0.0350    | 0.0333  | 0.0328  | 0.0197  | 0.0287     | 0.0291     | 0.0289  | 0.0212  | 0.0747  | 0.0314     | 0.0458   | 0.0380  | 0.1085  | 0.0597  | 0.0457     |
| LB      | 1937         | 0.0468      | 0.0198 | 0.0262    | 0.0248  | 0.0281  | 0.0254  | 0.0220     | 0.0494     | 0.0628  | 0.0316  | 0.0672  | 0.0364     | 0.0518   | 0.0603  | 0.0606  | 0.0531  | 0.0308     |
| US      | 1344         | 0.0275      | 0.0285 | 0.0302    | 0.0227  | 0.0211  | 0.0224  | 0.0455     | 0.0640     | 0.0554  | 0.0445  | 0.0491  | 0.0456     | 0.0300   | 0.0319  | 0.0357  | 0.0158  | 0.0432     |
| IL      | 1140         | 0.0224      | 0.0264 | 0.0415    | 0.0340  | 0.0552  | 0.0574  | 0.0285     | 0.0350     | 0.0348  | 0.0671  | 0.0762  | 0.0439     | 0.0550   | 0.0416  | 0.0521  | 0.0374  | 0.0443     |
| OM      | 969          | 0.0663      | 0.0439 | 0.0310    | 0.0139  | 0.0111  | 0.0178  | 0.0269     | 0.0583     | 0.0797  | 0.0318  | 0.0993  | 0.0899     | 0.0445   | 0.0669  | 0.1074  | 0.0442  | 0.0561     |
| CU      | 782          | 0.0243      | 0.0275 | 0.0237    | 0.0361  | 0.0558  | 0.0380  | 0.0304     | 0.0460     | 0.0524  | 0.0735  | 0.0418  | 0.0376     | 0.0582   | 0.0366  | 0.0547  | 0.0339  | 0.0405     |
| BR      | 578          | 0.0425      | 0.0339 | 0.0559    | 0.0493  | 0.0431  | 0.0266  | 0.0152     | 0.0807     | 0.0590  | 0.1318  | 0.1231  | 0.0900     | 0.1174   | 0.1543  | 0.1008  | 0.0793  | 0.0596     |
| SA      | 256          | 0.1077      | 0.0441 | 0.0542    | 0.0930  | 0.1281  | 0.1371  | 0.1394     | 0.1843     | 0.2266  | 0.2258  | 0.2392  | 0.2324     | 0.2366   | 0.2157  | 0.2314  | 0.1147  | 0.1189     |
| GB      | 221          | 0.0826      | 0.0624 | 0.0854    | 0.0691  | 0.1233  | 0.1206  | 0.1204     | 0.0560     | 0.0546  | 0.0999  | 0.0434  | 0.1064     | 0.0804   | 0.0733  | 0.0912  | 0.0978  | 0.0877     |
| NZ      | 110          | 0.0242      | 0.0155 | 0.0217    | 0.0322  | 0.1304  | 0.1341  | 0.0160     | 0.0751     | 0.0602  | 0.1633  | 0.1165  | 0.1334     | 0.0564   | 0.0465  | 0.0506  | 0.0433  | 0.0671     |
| GR      | 99           | 0.0274      | 0.0075 | 0.0637    | 0.1099  | 0.0816  | 0.1163  | 0.0971     | 0.0601     | 0.0358  | 0.0743  | 0.0450  | 0.0481     | 0.0471   | 0.0410  | 0.0506  | 0.0923  | 0.0582     |

**Supplementary Table 5.** Best Paradigm for ROC–AUC and AUC–PR Scores by Country

| Country | ROC–AUC                 |               | AUC–PR                |        |
|---------|-------------------------|---------------|-----------------------|--------|
|         | Paradigm                | Score         | Paradigm              | Score  |
| CZ      | Fine-tuned - FedYogi    | 0.9222        | Fine-tuned - FedYogi  | 0.7266 |
| IT      | Adaptive - FedProx      | 0.8168        | Fine-tuned - FedYogi  | 0.5247 |
| TR      | Adaptive - FedAVG       | 0.8891        | Fine-tuned - FedAdam  | 0.6139 |
| ES      | Adaptive - FedAVG       | 0.8028        | Fine-tuned - FedAdam  | 0.4644 |
| CA      | Adaptive - FedProx      | 0.7619        | Fine-tuned - FedAdam  | 0.4108 |
| AU      | Adaptive - FedAVG       | 0.7692        | Adaptive - FedAVG     | 0.3962 |
| PT      | Adaptive - FedAdagrad   | 0.8542        | Fine-tuned - FedProx  | 0.4774 |
| BE      | Adaptive - FedAVG       | 0.8225        | Fine-tuned - FedProx  | 0.4130 |
| KW      | Fine-tuned - FedAVG     | 0.9200        | Fine-tuned - FedAVG   | 0.5404 |
| HU      | Fine-tuned - FedProx    | 0.9632        | Fine-tuned - FedAVG   | 0.7887 |
| NL      | Local                   | 0.7107        | Centralized           | 0.2826 |
| TN      | Fine-tuned - FedAVG     | 0.9538        | Fine-tuned - FedProx  | 0.8664 |
| CH      | Centralized             | 0.7925        | Centralized           | 0.3400 |
| IR      | Fine-tuned - FedProx    | 0.8330        | Fine-tuned - FedProx  | 0.5702 |
| AR      | Adaptive - FedProx      | 0.8856        | Fine-tuned - FedProx  | 0.6332 |
| LB      | Adaptive - FedAdagrad   | 0.7741        | Adaptive - FedAdagrad | 0.3853 |
| US      | fine-tuned - FedYogi    | 0.7439        | Fine-tuned - FedYogi  | 0.3219 |
| IL      | Fine-tuned - FedAVG     | 0.8795        | Fine-tuned - FedAVG   | 0.6310 |
| OM      | Fine-tuned - FedProx    | 0.8731        | Fine-tuned - FedProx  | 0.5897 |
| CU      | Local                   | 0.8266        | Local                 | 0.5260 |
| BR      | Fine-tuned - FedYogi    | 0.8303        | Fine-tuned - FedProx  | 0.4911 |
| SA      | Centralized             | 0.9374        | Local                 | 0.7674 |
| GB      | Centralized             | 0.8510        | Centralized           | 0.4774 |
| NZ      | Adaptive - FedAdagrad   | 0.6905        | Adaptive - FedAdagrad | 0.2039 |
| GR      | Centralized             | 0.9292        | Centralized           | 0.9082 |
|         | <b>Weighted Average</b> | <b>0.8398</b> | <b>0.5383</b>         |        |

the Flower simulation framework<sup>3</sup>. A high-level comparison of their conceptual differences relative to AdaptiveDualBranchNet is provided in Table 6.

**Supplementary Table 6.** Comparison of Personalization Federated Learning Strategies

| Aspect                     | AdaptiveDualBranchNet          | FedPer                     | Ditto                    |
|----------------------------|--------------------------------|----------------------------|--------------------------|
| Architecture Type          | Dual-branch (core + extension) | Split-layer MLP            | Single MLP               |
| Personalization Scope      | Extension branch               | Final layers               | Entire model             |
| Adaptivity                 | Yes (via data size $n_i$ )     | No (fixed layers)          | No (regularization only) |
| Personalization Method     | Structural + adaptive depth    | Structural split           | Optimization constraint  |
| Synchronized Parameters    | $\theta_c$ (core only)         | $\theta_s$ (shared layers) | $\theta$ (global model)  |
| Client-Specific Components | $\theta_e^{(i)}$               | $\theta_p^{(i)}$           | $w_i$                    |

The Ditto<sup>1</sup> algorithm represents an optimization-based PFL strategy. Each client  $i$  maintains both a personalized model copy ( $w_i$ ) and a local version of the global model ( $\theta$ ). While the global model  $\theta$  is updated via standard FedAVG, the personalized model  $w_i$  is trained locally on data  $\mathcal{D}_i$  by minimizing the regularized objective  $\mathcal{L}_{\text{Ditto}}(w_i) = \mathcal{L}_{\text{local}}(w_i; \mathcal{D}_i) + \frac{\lambda}{2} \|w_i - \theta\|^2$ . Here, the regularization hyperparameter  $\lambda$  controls the proximity to the global model. We used the same base network architecture as the FedAVG-Baseline and tested  $\lambda \in \{0.05, 0.1, 0.3\}$ . Local optimization involved 10 steps per round.

On the other hand, the FedPer<sup>2</sup> algorithm employs architectural personalization by partitioning the model into shared base layers ( $\theta_s$ ) and client-specific layers ( $\theta_p^{(i)}$ ). Only  $\theta_s$  are globally aggregated via FedAVG;  $\theta_p^{(i)}$  are trained locally and remain private. Using the FedAVG-Baseline architecture, we evaluated configurations where the final 1, 2, or 3 fully connected layers served as the personalized head (FedPer-1, FedPer-2, FedPer-3, respectively). Both shared and personalized parameters were updated during local training steps.

The comparative performance of these methods is summarized in Table 7 and visualized per-client in Figure 1. The key findings from these benchmark experiments indicate that, for this specific task and highly heterogeneous dataset, Ditto’s performance remained comparable to the non-personalized FedAVG baseline across the tested  $\lambda$  values (e.g., ROC–AUC  $\approx$  0.782 vs. FedAVG’s 0.7845). In contrast, FedPer demonstrated consistent improvement over FedAVG, with FedPer-3 achieving the best results among the fixed-layer variants (ROC–AUC 0.8135).

However, FedPer’s strategy led to a weaker global model as expected, since part of original model stays at local (see Table 7, FedPer-GlobalModel rows), indicating a trade-off between personalization and the strength of the shared representation. In comparison, AdaptiveDualBranchNet achieved better average performance (ROC–AUC 0.8391, AUC–PR 0.5281), suggesting that its dynamic architectural adaptation enables more effective personalization while maintaining a strong global model.

The radar plot in Figure 1 visually corroborates these findings. The cyan line representing AdaptiveDualBranchNet consistently encloses a larger area, reflecting generally higher ROC–AUC scores across most of the 32 clients, compared to FedPer (red) and Ditto/FedAvg-Baseline (blue/pink). This suggests that the adaptive approach is better suited to handling the substantial client heterogeneity present in this dataset.

To further highlight the importance of adaptivity, rather than simply increasing parameter count by adding layers, we refer to Supplementary Table 8, which summarizes the total number of layers in AdaptiveDualBranchNet. As expected, the core layers remain fixed at 3, while the adaptive extension layers vary across clients. The mean number of extension layers is 0.9375, effectively corresponding to one additional layer on average. This is particularly insightful when compared to FedPer with one personalization layer (FedPer-1), which employs a fixed architecture of 4 shared layers and 1 personalized layer, totaling 5 hidden layers. In contrast, AdaptiveDualBranchNet operates with fewer layers on average, yet consistently achieves better performance. This underscores that its strength lies not in parameter count, but in its ability to flexibly adjust model capacity to match client data heterogeneity, expanding for clients with abundant data and contracting for those with limited data.

It is important to note that the reported results for Ditto and FedPer correspond to a specific set of parameter choices (e.g.,  $\lambda$  or number of local epochs  $E$ , personalization layers); Further tuning of these hyperparameters may yield minor performance differences but is unlikely to alter the observed overall trends.

#### 1.4 Client-Level Fine-Tuning Performance Analysis

While PFL aims to tailor models to local data, the strategy of fine-tuning pre-trained global models presents challenges, particularly under the extreme client data heterogeneity observed in this study. Adapting models on clients with very limited data risks overfitting to local noise or catastrophic forgetting of valuable knowledge acquired during federated training. Furthermore, reliably evaluating performance on correspondingly small, potentially imbalanced test sets is inherently difficult. This challenge was evident in our analysis of the seven smallest client cohorts (<1000 samples), where for the majority (six out of seven), the locally trained model did not outperform the PFL models or the centralized learning, underscoring the instability

**Supplementary Table 7.** Average ROC–AUC and AUC–PR across 3 runs for different personalized federated learning methods

| Experiment           | ROC–AUC | AUC–PR |
|----------------------|---------|--------|
| FedAVG-Adaptive      | 0.8391  | 0.5281 |
| FedPer-3             | 0.8135  | 0.4157 |
| FedPer-2             | 0.8052  | 0.4042 |
| FedPer-1             | 0.7967  | 0.3902 |
| FedAVG-Baseline      | 0.7845  | 0.4034 |
| Ditto-0.1            | 0.7826  | 0.4075 |
| Ditto-0.05           | 0.7824  | 0.4023 |
| Ditto-0.3            | 0.7814  | 0.4025 |
| FedPer-3-GlobalModel | 0.5206  | 0.1295 |
| FedPer-2-GlobalModel | 0.4684  | 0.1072 |
| FedPer-1-GlobalModel | 0.4527  | 0.1022 |

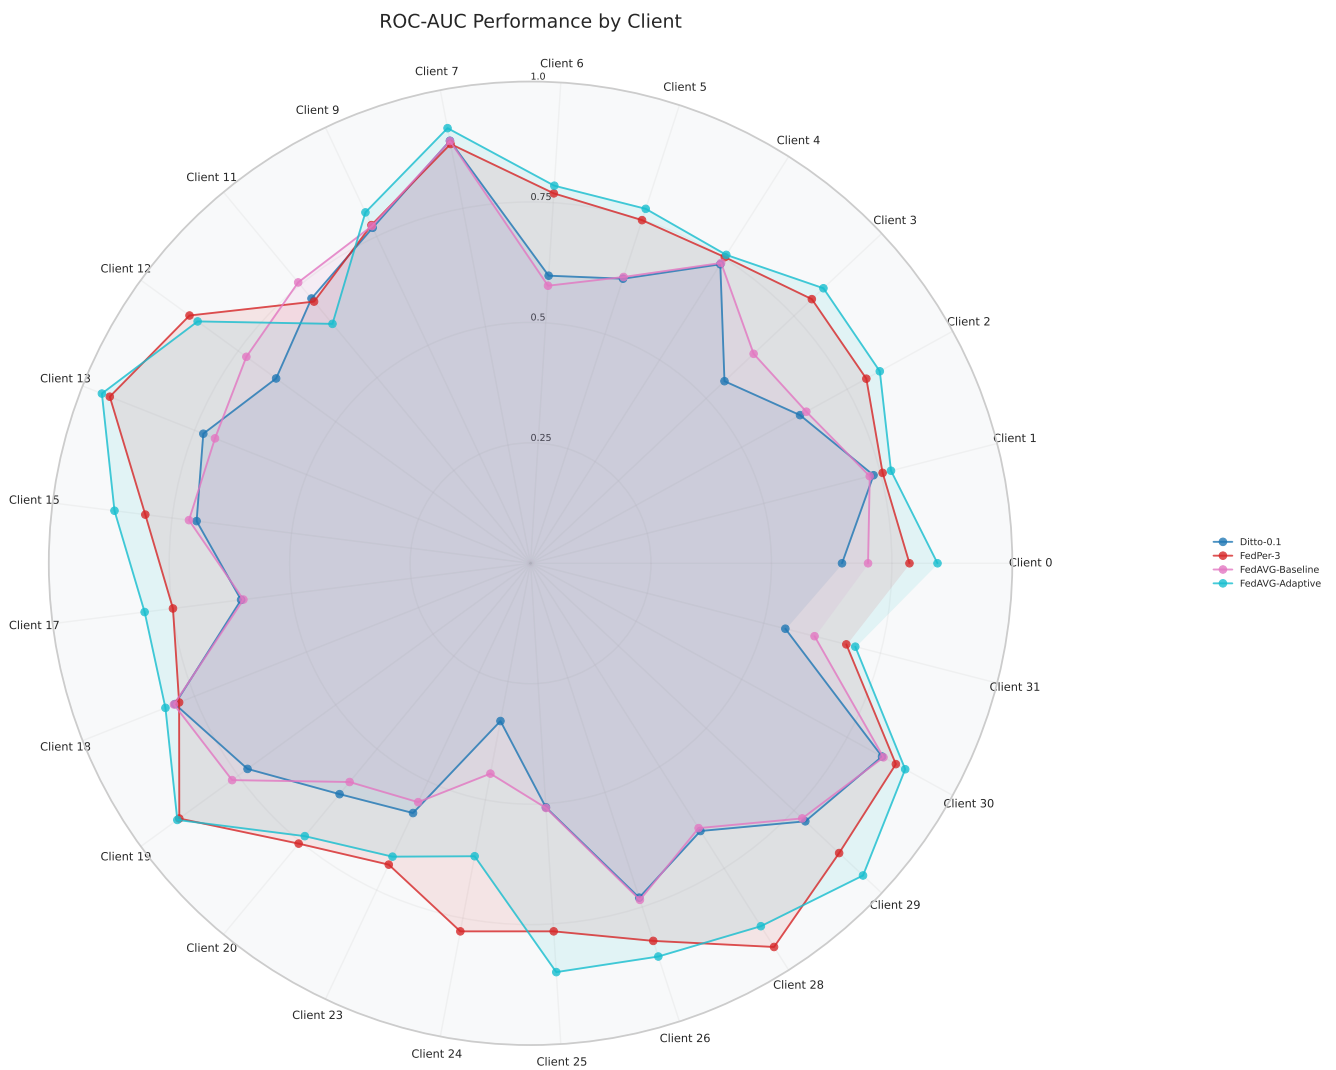

**Supplementary Figure 1.** Radar chart illustrating client-specific benchmarking across various PFL methods

of fine-tuning in data-scarce regimes. Performance metrics reported for such low-resource clients must therefore be interpreted with considerable caution.

**Supplementary Table 8.** Number of Core and Extension Layers per Country as Determined by the AdaptiveDualBranchNet Extension Layer Calculation Rule. The Total Hidden Layers are computed as the sum of core and extension layers.

| Country | Core Layers | Extension Layers | Total Hidden Layers | Country | Core Layers | Extension Layers | Total Hidden Layers |
|---------|-------------|------------------|---------------------|---------|-------------|------------------|---------------------|
| AR      | 3           | 0                | 3                   | IN      | 3           | 0                | 3                   |
| AU      | 3           | 2                | 5                   | IR      | 3           | 0                | 3                   |
| BE      | 3           | 1                | 4                   | IT      | 3           | 5                | 8                   |
| BR      | 3           | 0                | 3                   | KW      | 3           | 1                | 4                   |
| CA      | 3           | 3                | 6                   | LB      | 3           | 0                | 3                   |
| CH      | 3           | 1                | 4                   | MK      | 3           | 0                | 3                   |
| CU      | 3           | 0                | 3                   | MT      | 3           | 0                | 3                   |
| CZ      | 3           | 5                | 8                   | NL      | 3           | 1                | 4                   |
| EG      | 3           | 0                | 3                   | NZ      | 3           | 0                | 3                   |
| ES      | 3           | 4                | 7                   | OM      | 3           | 0                | 3                   |
| FR      | 3           | 0                | 3                   | PT      | 3           | 1                | 4                   |
| GB      | 3           | 0                | 3                   | RO      | 3           | 0                | 3                   |
| GR      | 3           | 0                | 3                   | SA      | 3           | 0                | 3                   |
| HU      | 3           | 1                | 4                   | TN      | 3           | 1                | 4                   |
| IE      | 3           | 0                | 3                   | TR      | 3           | 4                | 7                   |
| IL      | 3           | 0                | 3                   | US      | 3           | 0                | 3                   |

Our primary mitigation involved using the converged FL model as a strong starting point and employing constrained fine-tuning parameters (e.g., reduced learning rate, reduce batch size and add L2/early stopping when triggered). While alternative strategies like freezing initial layers were explored, they did not yield substantial average performance differences across the federation, likely due to the limited influence of these small clients on overall metrics. However, fine-tuning demonstrated clear value for specific client subgroups, as illustrated in Figure 2. This analysis shows the average ROC–AUC improvement post-fine-tuning, stratified by dataset size and initial FL performance quantiles. While clients with the smallest datasets (Q1/Q1) showed potentially unreliable average gains, clients with intermediate data sizes (Q2 and Q3), particularly those initially underserved by the global model (lower performance quantiles), experienced significant performance enhancements (e.g., average gains of 0.11-0.21 ROC–AUC points). This indicates that fine-tuning is most impactful for clients possessing sufficient local data to support stable adaptation.

Addressing the specific needs of low-resource clients requires further investigation. Future research could explore strategies such as client clustering or grouping based on data similarity (potentially identified using methods like OTDD<sup>4</sup>), enabling more robust collaborative adaptation within these clusters. Implementing such approaches in practice, however, must carefully navigate the associated privacy and governance complexities inherent in real-world clinical data sharing.

## References

1. Li, T., Hu, S., Beirami, A. & Smith, V. Ditto: Fair and robust federated learning through personalization. In Meila, M. & Zhang, T. (eds.) *Proceedings of the 38th International Conference on Machine Learning*, vol. 139 of *Proceedings of Machine Learning Research*, 6357–6368, DOI: [10.48550/arXiv.2012.04221](https://doi.org/10.48550/arXiv.2012.04221) (PMLR, 2021).
2. Arivazhagan, M. G., Aggarwal, V., Singh, A. K. & Choudhary, S. Federated learning with personalization layers, DOI: [10.48550/arXiv.2003.00295](https://doi.org/10.48550/arXiv.2003.00295) (2019). [1912.00818](https://arxiv.org/abs/1912.00818).
3. Beutel, D. J. *et al.* Flower: A friendly federated learning research framework, DOI: [10.48550/arXiv.2007.14390](https://doi.org/10.48550/arXiv.2007.14390) (2020).
4. Alvarez-Melis, D. & Fusi, N. Geometric dataset distances via optimal transport. In *Proceedings of the 34th International Conference on Neural Information Processing Systems*, NIPS '20, DOI: [10.5555/3495724.3497523](https://doi.org/10.5555/3495724.3497523) (Curran Associates Inc., Red Hook, NY, USA, 2020).

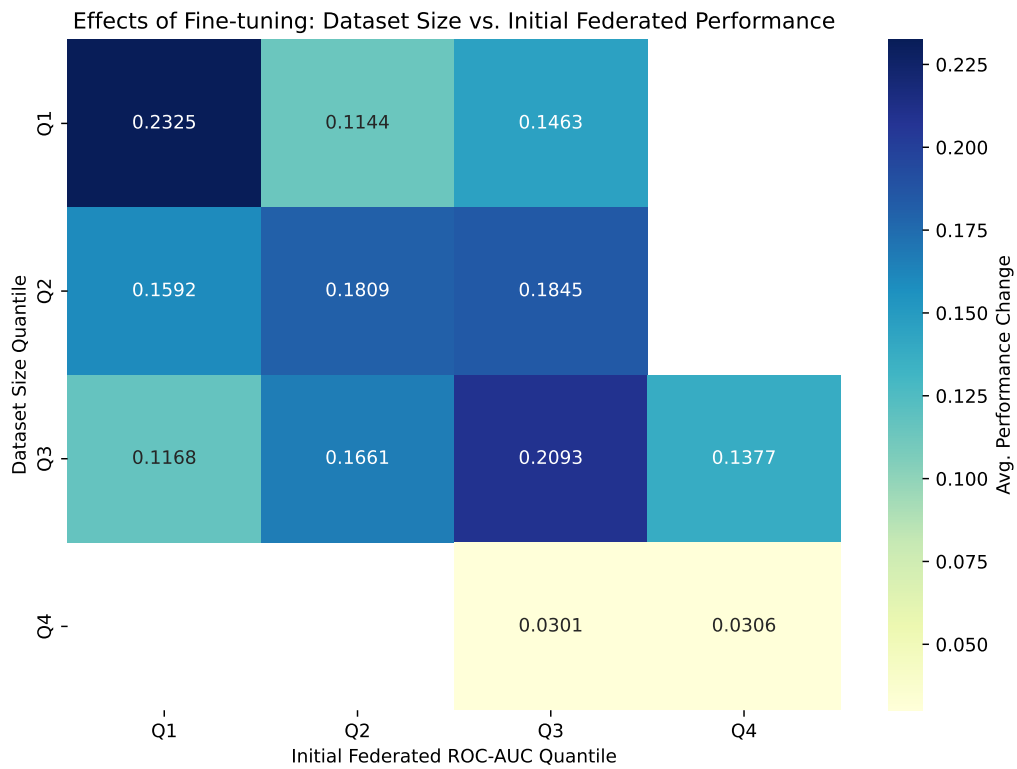

**Supplementary Figure 2.** Effects of Fine-tuning: Heatmap visualization of dataset size quantiles vs. initial federated performance quantiles, numbers within the quantiles highlight the average change of the performance after fine-tuning
